## Dapagliflozin reduces the risk of hyperkalaemia in patients with heart failure and reduced ejection fraction: a secondary analysis DAPA-HF

S.L. Kristensen<sup>1</sup>, K.F. Docherty<sup>2</sup>, P.S. Jhund<sup>2</sup>, O. Bengtsson<sup>3</sup>, D.L. Demets<sup>4</sup>, S.E. Inzucchi<sup>5</sup>, L. Kober<sup>1</sup>, M.N. Kosiborod<sup>6</sup>, A.M. Langkilde<sup>3</sup>, F.A. Martinez<sup>7</sup>, P. Ponikowski<sup>8</sup>, M.S. Sabatine<sup>9</sup>, M. Sjostrand<sup>3</sup>, S.D. Solomon<sup>9</sup>, J.J.V. McMurray<sup>2</sup>

<sup>1</sup>Rigshospitalet - Copenhagen University Hospital, Copenhagen, Denmark; <sup>2</sup>University of Glasgow, Glasgow, United Kingdom; <sup>3</sup>AstraZeneca, Gothenburg, Sweden; <sup>4</sup>University of Wisconsin-Madison, Madison, United States of America; <sup>5</sup>Yale University, New Haven, United States of America; <sup>6</sup>St. Luke's Mid America Heart Institute, Kansas City, United States of America; <sup>7</sup>National University of Cordoba, Cordoba, Argentina; <sup>8</sup>Wroclaw Medical University, Wroclaw, Poland; <sup>9</sup>Brigham and Women's Hospital, Harvard Medical School, Boston, United States of America  
**Funding Acknowledgement:** Type of funding source: Private company. Main funding source(s): DAPA-HF study was funded by AstraZeneca

**Background:** Hyperkalaemia often limits the use of mineralocorticoid receptor antagonists (MRAs) in patients with heart failure and reduced ejection fraction (HFrEF), denying these patients a life-saving therapy.

**Purpose:** To determine whether treatment with the sodium-glucose co-transporter 2 (SGLT-2) inhibitor dapagliflozin reduces the risk of hyperkalaemia associated with MRA use in patients with HFrEF.

**Methods:** The risk of developing mild hyperkalaemia (potassium >5.5 mmol/L) and moderate/severe hyperkalaemia (>6.0 mmol/L) was examined in the Dapagliflozin And Prevention of Adverse-outcomes in Heart Failure trial (DAPA-HF) according to background MRA use, and randomized treatment assignment, by use of Cox regression analyses.

**Results:** Overall, 3370 (70.1%) patients in DAPA-HF were treated with an MRA. Mild hyperkalaemia and moderate/severe hyperkalaemia occurred in 182 (11.1%) and 23 (1.4%) patients treated with dapagliflozin as compared to 204 (12.6%) and 40 (2.4%) of patients given placebo (Table and Figure). This yielded a hazard ratio (HR) of 0.86 (0.70–1.05) for mild hyperkalaemia and 0.50 (0.29, 0.85) for moderate/severe hyperkalaemia, comparing dapagliflozin to placebo.

**Conclusions:** Patients with HFrEF and taking a MRA who were randomized to dapagliflozin had half the incidence of moderate/severe hyperkalaemia, compared with those randomized to placebo.

Incident hyperkalaemia in DAPA-HF

|                                               | Dapagliflozin       |                | Placebo             |                | HR (95% CI)      | P-value |
|-----------------------------------------------|---------------------|----------------|---------------------|----------------|------------------|---------|
|                                               | No. events/patients | Rate per 100py | No. events/patients | Rate per 100py |                  |         |
| Mild hyperkalaemia (>5.5 mmol/L)*             |                     |                |                     |                |                  |         |
| No MRA at baseline                            | 63/661              | 7.1            | 58/684              | 6.5            | 1.20 (0.84–1.72) | 0.32    |
| MRA treated at baseline                       | 182/1637            | 8.6            | 204/1626            | 9.8            | 0.86 (0.70–1.05) | 0.14    |
| All patients                                  | 245/2298            | 8.2            | 262/2310            | 8.8            | 0.93 (0.78–1.11) | 0.42    |
| Moderate/Severe hyperkalaemia (>6.0 mmol/L)** |                     |                |                     |                |                  |         |
| No MRA at baseline                            | 13/676              | 1.4            | 11/697              | 1.1            | 1.17 (0.52–2.62) | 0.71    |
| MRA treated at baseline                       | 23/1688             | 1.0            | 40/1667             | 1.7            | 0.50 (0.29–0.85) | 0.010   |
| All patients                                  | 36/2364             | 1.1            | 51/2364             | 1.6            | 0.64 (0.42–0.99) | 0.046   |

Models adjusted for baseline potassium and stratified by diabetes status at randomization. \*Excluding those with baseline K<sup>+</sup> >5.5 (n=136);

\*\*Excluding those with baseline K<sup>+</sup> >6.0 (n=16). Abbreviations: CI, confidence interval; HR, hazard ratio; MRA, mineralocorticoid receptor antagonist; PY, patient-years.

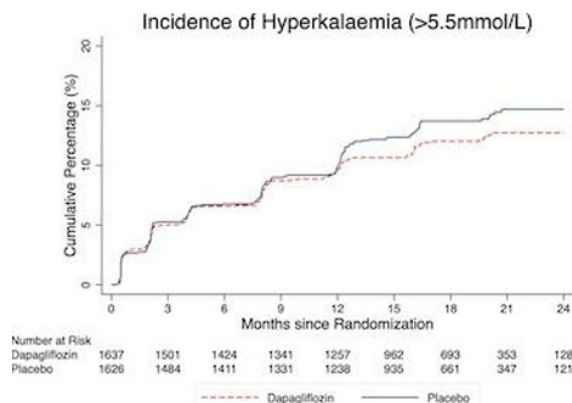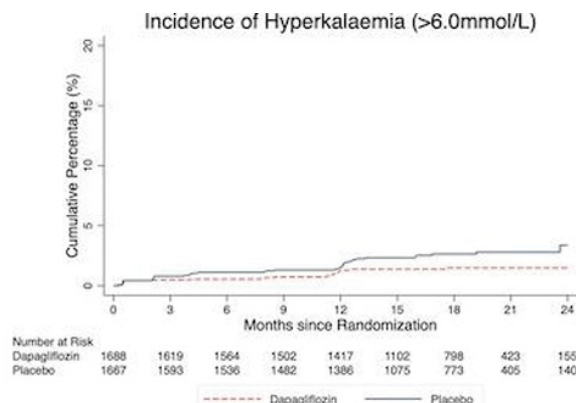

Source: http://academic.oup.com/eurheartj/article-pdf/41/Supplement_2/ehaa946.0939/34517075/ehaa946.0939.pdf
